# Supplementary material for: The Carbohydrate Sensitive Rat as a Model of Obesity
Source: PubMed Central journal article supplement (PMC3728328; doi:10.1371/journal.pone.0068436), 2013-07-30

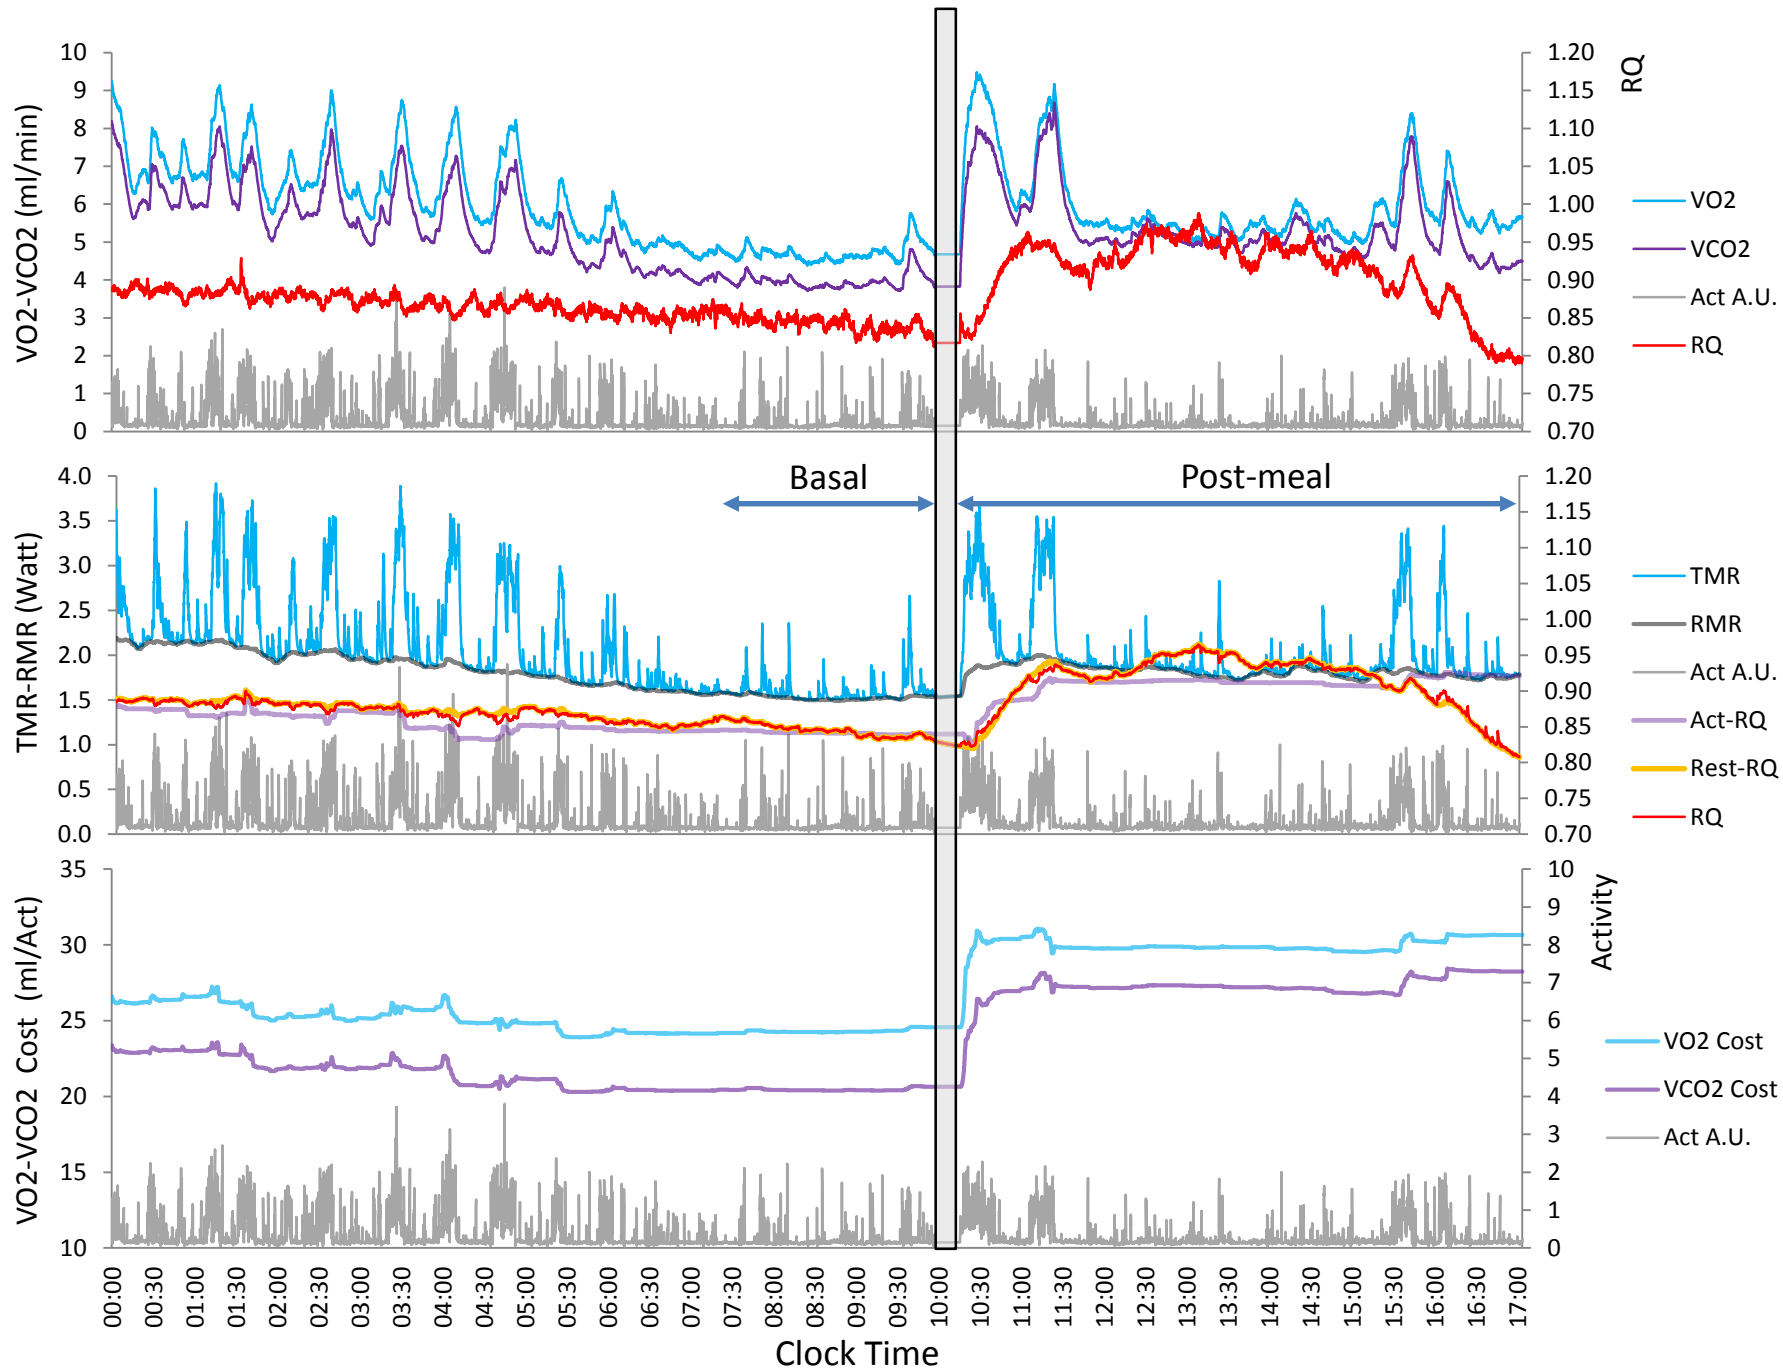

Supplement: pone.0068436.s002.pdf [file pone.0068436.s002.pdf]
